# Supplementary material
Source: PubMed Central journal article supplement (PMC6821213)
Supplement: awy344_supplementary_references.pdf [file awy344_supplementary_references.pdf]

## Supplementary references

Baranzini SE, Mudge J, Van Velkinburgh JC, Khankhanian P, Khrebtukova I, Miller NA, et al. Genome, epigenome and RNA sequences of monozygotic twins discordant for multiple sclerosis. *Nature* 2010; 464: 1351–6.

Efron B. Bootstrap methods: another look at the Jackknife. *Ann Stat* 1979; 7: 1–26.

Houseman E, Accomando WP, Koestler DC, Christensen BC, Marsit CJ, Nelson HH, et al. DNA methylation arrays as surrogate measures of cell mixture distribution. *BMC Bioinform* 2012; 13: 86.

Lehne B, Drong AW, Loh M, Zhang W, Scott WR, Tan ST, et al. A coherent approach for analysis of the Illumina HumanMethylation450 BeadChip improves data quality and performance in epigenome-wide association studies. *Genome Biol* 2015; 16: 37.

Nordlund J, Baćklin CL, Wahlberg P, Busche S, Berglund EC, Eloranta ML, et al. Genome-wide signatures of differential DNA methylation in pediatric acute lymphoblastic leukemia. *Genome Biol* 2013; 14: r105.

Puellmann K, Kaminski WE, Vogel M, Nebe CT, Schroeder J, Wolf H, et al. A variable immunoreceptor in a subpopulation of human neutrophils. *Proc Natl Acad Sci* 2006; 103: 14441–6.

Rahmani E, Zaitlen N, Baran Y, Eng C, Hu D, Galanter J, et al.

Sparse PCA corrects for cell type heterogeneity in epigenome-wide association studies. *Nat Methods* 2016; 13: 443–5.

San´chez J. Rosner, B.: *Fundamentals of biostatistics*, 3rd edn. Boston:

PWS-Kent; 1990, xv, 655 pp., US \$ 14.95, ISBN 0-534-91973-1. 125

*Biometrical J* 1993; 35: 150.

Teschendorff AE, Zheng SC. Cell-type deconvolution in epigenomewide association studies: a review and recommendations.

*Epigenomics* 2017; 9: 757–68.

Zhou W, Laird PW, Shen H. Comprehensive characterization, annotation and innovative use of Infinium DNA methylation BeadChip probes. *Nucleic Acids Res.* 2017; 45: e22.

Zou JY. Correcting for sample heterogeneity in methylome-wide association studies. In: *Methods in Molecular Biology*. New York, NY:

Humana Press; 2017. P. 107–114.
