# Supplementary material
Source: PubMed Central journal article supplement (PMC6821213)
Supplement: awy344_supplementary_tables.pdf [file awy344_supplementary_tables.pdf]

**Supplementary Table 1. Demographic and clinical characteristics of our patient cohorts.**

| Subjects<br>RRMS<br>Discovery            | Naïve<br>N=47                                                                                                                                        | FAE<br>N=35                                                                                                                                         | GA<br>N=16                                                                                                                                          |                                                            | Subjects<br>RRMS<br>Validation           | FAE<br>N=7                                                                                                                                         |
|------------------------------------------|------------------------------------------------------------------------------------------------------------------------------------------------------|-----------------------------------------------------------------------------------------------------------------------------------------------------|-----------------------------------------------------------------------------------------------------------------------------------------------------|------------------------------------------------------------|------------------------------------------|----------------------------------------------------------------------------------------------------------------------------------------------------|
| Age<br>(SD)                              | 38.4<br>(10.7)                                                                                                                                       | 42.3<br>(9.8)                                                                                                                                       | 43.4<br>(10.9)                                                                                                                                      | ANOVA<br>$F_{(2,95)}=2.143$<br>$p=0.123$                   | Age<br>(SD)                              | 41.2<br>(8.3)                                                                                                                                      |
| Gender                                   | F: 31 (66%)                                                                                                                                          | F: 21 (60%)                                                                                                                                         | F: 9 (56%)                                                                                                                                          | chi-squared<br>$Xsq^2=0.59539$<br>$p=0.7425$               | Gender                                   | F: 3 (42.9%)                                                                                                                                       |
| Race                                     | Caucasian: 32<br>(68.1%)<br>NonCaucasian: 15<br>• Asian: 0<br>• Black: 9<br>• Black-<br>Caucasian: 2<br>• Caucasian-<br>Hispanic: 0<br>• Hispanic: 4 | Caucasian: 29<br>(82.9%)<br>NonCaucasian: 6<br>• Asian: 1<br>• Black: 1<br>• Black-<br>Caucasian: 0<br>• Caucasian-<br>Hispanic: 2<br>• Hispanic: 2 | Caucasian: 11<br>(69.8%)<br>NonCaucasian: 5<br>• Asian: 0<br>• Black: 4<br>• Black-<br>Caucasian: 0<br>• Caucasian-<br>Hispanic: 0<br>• Hispanic: 1 | chi-squared<br>$Xsq^2=2.4643$<br>$p=0.2917$                | Race                                     | Caucasian: 3<br>(42.9%)<br>NonCaucasian: 4<br>• Asian: 0<br>• Black: 2<br>• Black-<br>Caucasian: 1<br>• Caucasian-<br>Hispanic: 0<br>• Hispanic: 1 |
| BMI<br>(SD)                              | 25.7<br>(5.5)                                                                                                                                        | 25.3*<br>(4.9)                                                                                                                                      | 25.6<br>(4.3)                                                                                                                                       | ANOVA<br>$F_{(2,95)}=0.061$<br>$p=0.941$                   | BMI<br>(SD)                              | 26.6<br>(5.8)                                                                                                                                      |
| Disease<br>Duration-<br>months<br>(SD)   | 40.4<br>(57.1)                                                                                                                                       | 130.0<br>(90.2)                                                                                                                                     | 100.0<br>(73.0)                                                                                                                                     | ANOVA<br>$F_{(2,95)}=15.65$<br>$p<0.0001$                  | Disease<br>Duration-<br>months<br>(SD)   | 68.5<br>(71.7)                                                                                                                                     |
| EDSS<br>Median<br>(Range)                | 1.5<br>(0-3.5)                                                                                                                                       | 1<br>(0-3.5)                                                                                                                                        | 1.25<br>(0-2.5)                                                                                                                                     | ANOVA<br>$F_{(2,95)}=1.423$<br>$p=0.246$                   | EDSS<br>median<br>(Range)                | 2<br>(1-3)                                                                                                                                         |
| Treatment<br>Duration-<br>months<br>(SD) | 0                                                                                                                                                    | 18.0<br>(8.3)                                                                                                                                       | 56.8<br>(52.9)                                                                                                                                      | Welch t-test;<br>$t_{15.337}=-$<br>$2.9171$<br>$p=0.01043$ | Treatment<br>Duration-<br>months<br>(SD) | 10.5<br>(2.9)                                                                                                                                      |

\*One missing BMI value in FAE group: replaced by BMI median

We recruited 47 treatment-naïve RRMS patients, 35 FAE-treated patients and 16 GA-treated patients in our discovery cohort and 7 RRMS patients in our prospective validation cohort. The three cross-sectional groups were similar in demographic and disease characteristics except

disease duration between treatment-naïve and all treated patients (ANOVA;  $F_{(2,95)}=15.65$ ,  $p<0.0001$ ). GA-treated patients also had a longer treatment duration compared to FAE-treated patients (Welch's t-test;  $t_{15.337}=-2.9171$ ,  $p=0.0104$ ). RRMS: relapsing remitting multiple sclerosis, FAE: fumaric acid esters, GA: glatiramer acetate, SD: standard deviation, F: female, BMI: body mass index

**Supplementary Table 2. T cell antibody cocktail used for immunophenotyping.** Whole blood was collected from each participant at study enrollment and was processed within 3 hours by the Mount Sinai's Human Immune Monitoring Core. Cells were stained with a pre-optimized T-cell antibody cocktail that contained anti-CD45, anti-CD3, anti-CD4, anti-CD8, anti-CCR4 and anti-CCR6 antibodies.

| Antigen | Fluorochrome   |
|---------|----------------|
| CD45    | Pacific Orange |
| CD3     | BV650          |
| CD4     | AlexaFluor 700 |
| CD8     | PECF594        |
| CCR4    | BV605          |
| CCR6    | AlexaFluor 488 |
